# Supplementary material
Source: PubMed Central journal article supplement (PMC6589121)
Supplement: NIHMS1527890-supplement-1.pdf [file NIHMS1527890-supplement-1.pdf]

Figure S1

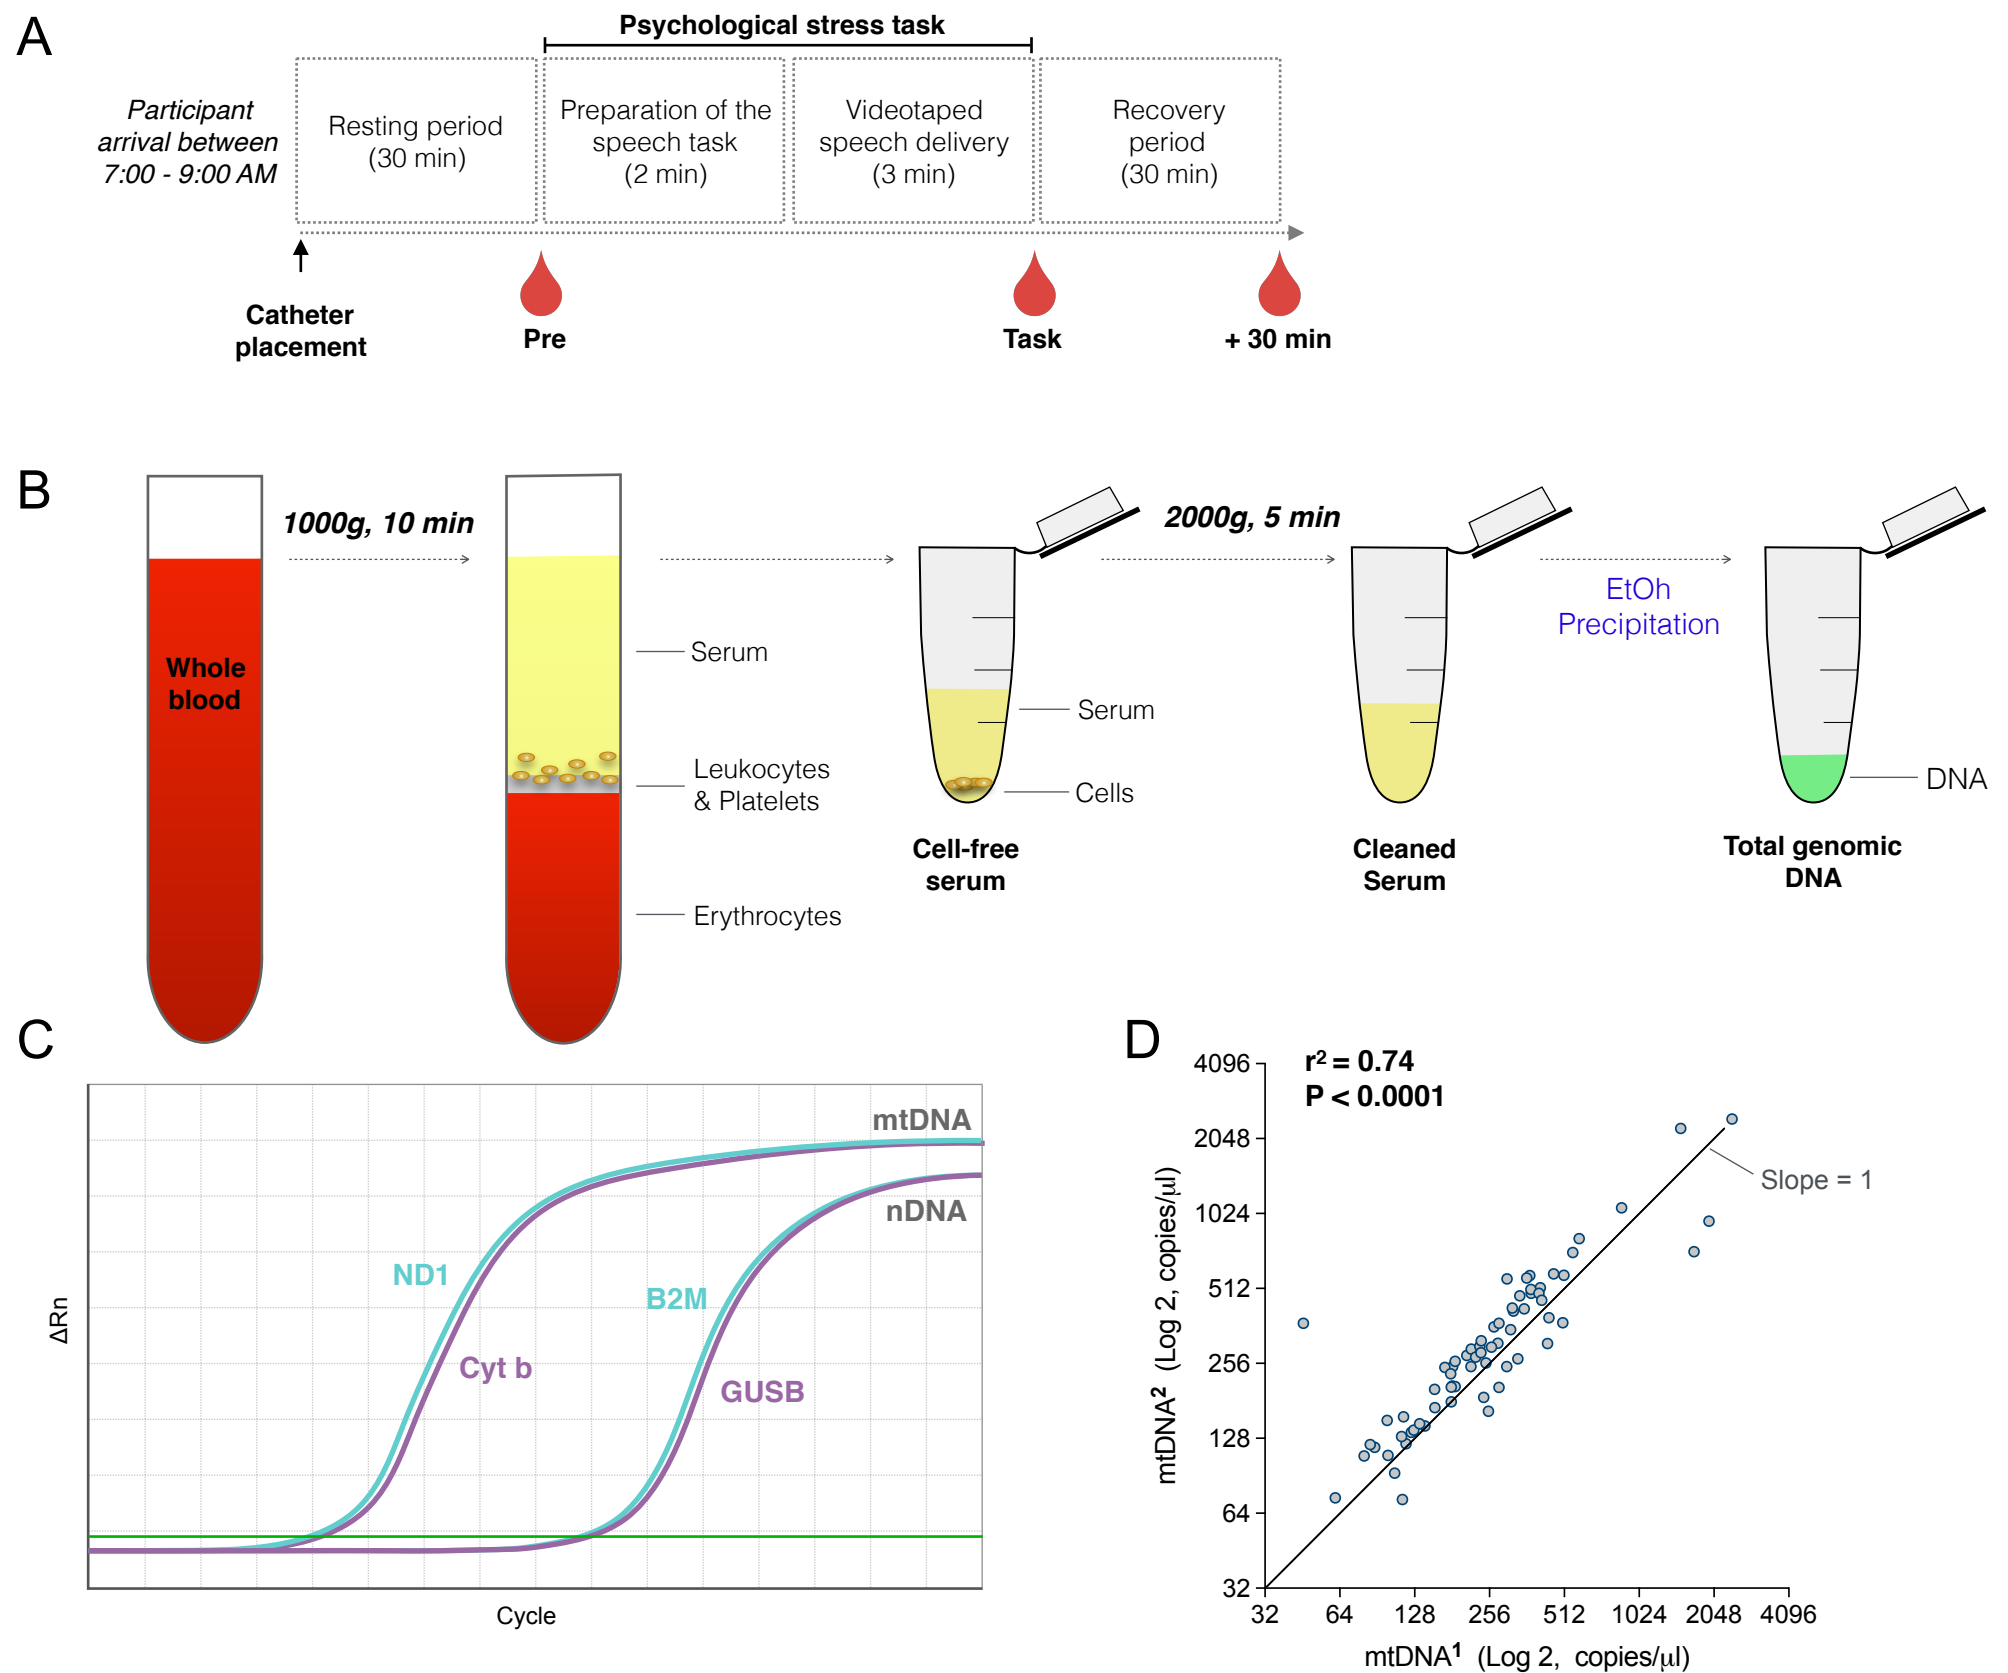

**Fig. S1. Human cell-free serum contains circulating mitochondrial and nuclear DNA (A)** Detailed study timeline. **(B)** Workflow used to obtain cell-free serum. **(C)** Schematic of amplification plot for duplex Taqman qPCR reactions for mitochondrial and nuclear amplicons. *mt-ND1/B2m* and *mt-CYTB/Gusb* are run as pairs in duplex reactions. **(D)** Comparison of abundance for mtDNA amplicons 1 (*mt-ND1*, mtDNA<sup>1</sup>) and 2 (*mt-CYTB*, mtDNA<sup>2</sup>) at *pre* for sessions 1 and session 2. R-squared from linear regression on non-transformed data,  $n = 69$  for both sessions.

**Figure S2**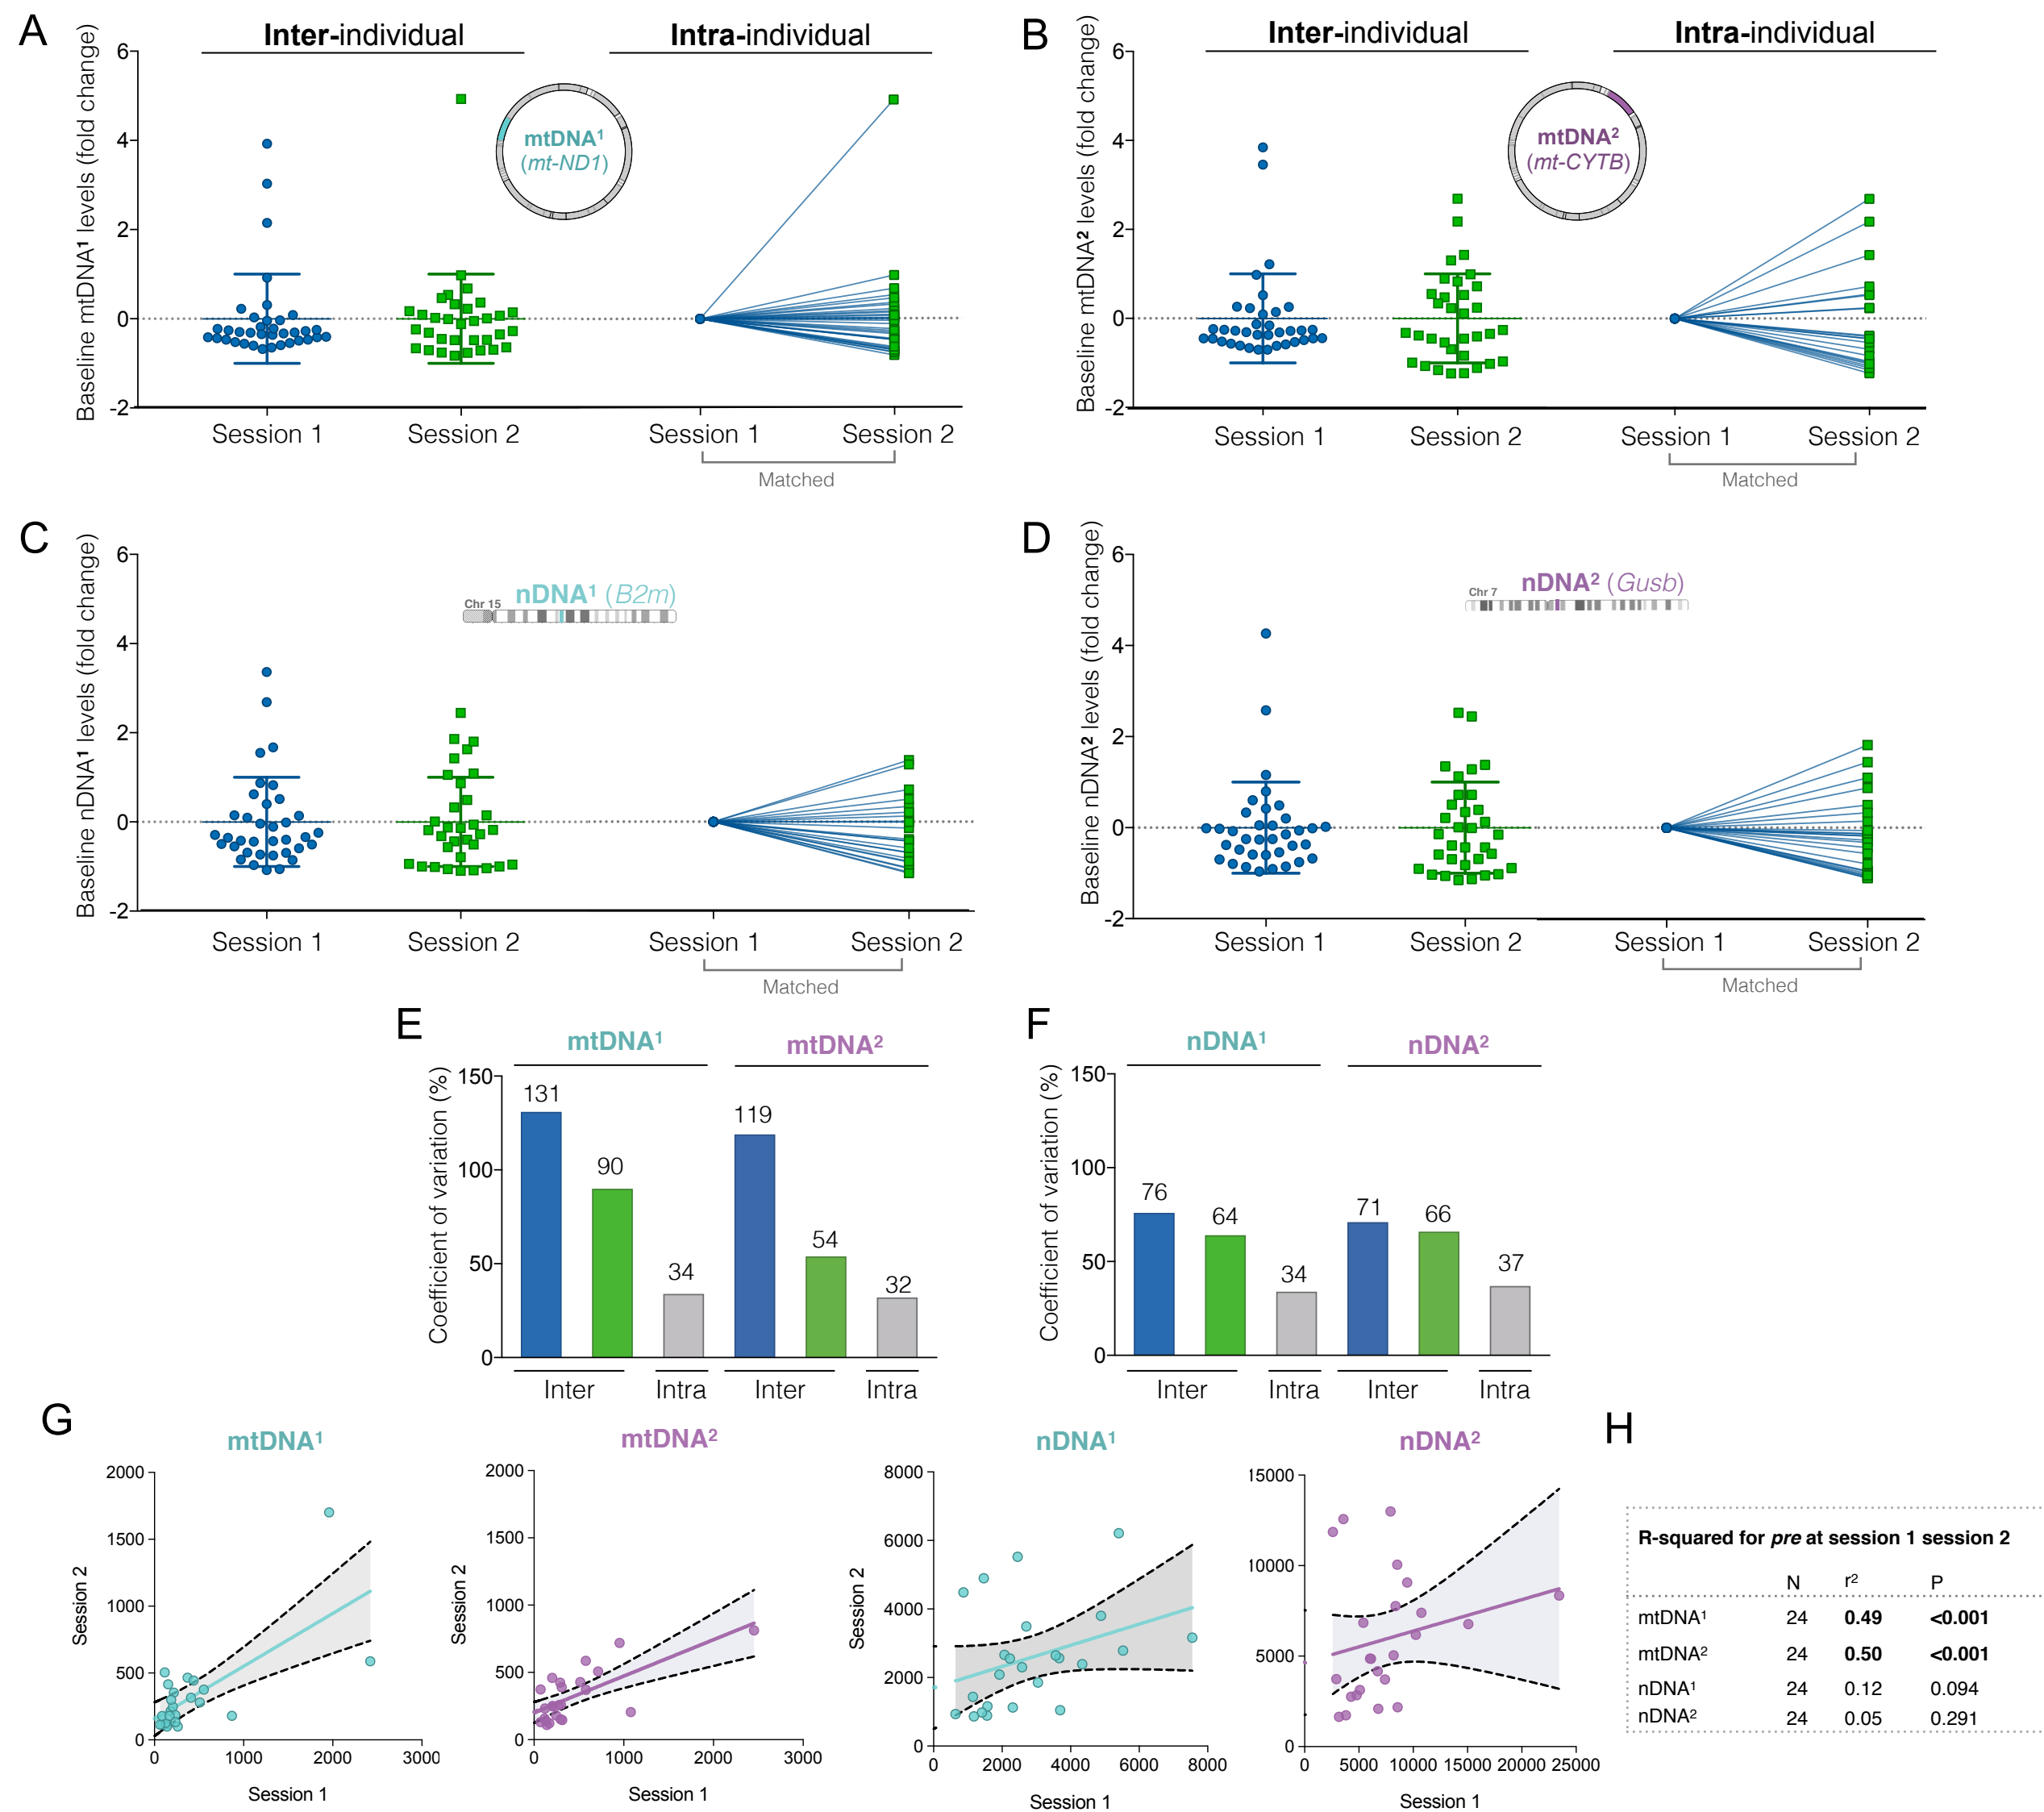

**Fig. S2. Inter- and intra-individual variability in baseline ccf-mtDNA.** (A) Baseline “pre” ccf-mtDNA<sup>1</sup> (*mt-ND1*) levels for each participant at both sessions (left) illustrating *inter*-individual variability, and expressed relative to session 1 values for each participant (right), illustrating *intra*-individual variability. Values are centered at the group mean. (B) Same as in (A) for mtDNA<sup>2</sup> (*mt-CYTB*), showing similar results for both mtDNA amplicons. (C) Same as in (A) but with ccf-nDNA<sup>1</sup> (*B2m*), and (D) with nDNA<sup>2</sup> (*Gusb*). (E) Coefficient of variation of *inter*-individual variability at session 1 (blue) and two (green) and *intra*-individual variability between sessions (grey) of “pre” ccf-mtDNA<sup>1</sup> and ccf-mtDNA<sup>2</sup>. Coefficient of variation were determined on non-transformed data. (F) Same as in (E) for ccf-nDNA<sup>1</sup> and ccf-nDNA<sup>2</sup>. (G) Correlations of the abundance of mtDNA and nDNA amplicons for sessions 1 and session 2. (H) Results of linear regressions from (G), R-squared calculated from non-transformed data, n = 24.

Figure S3

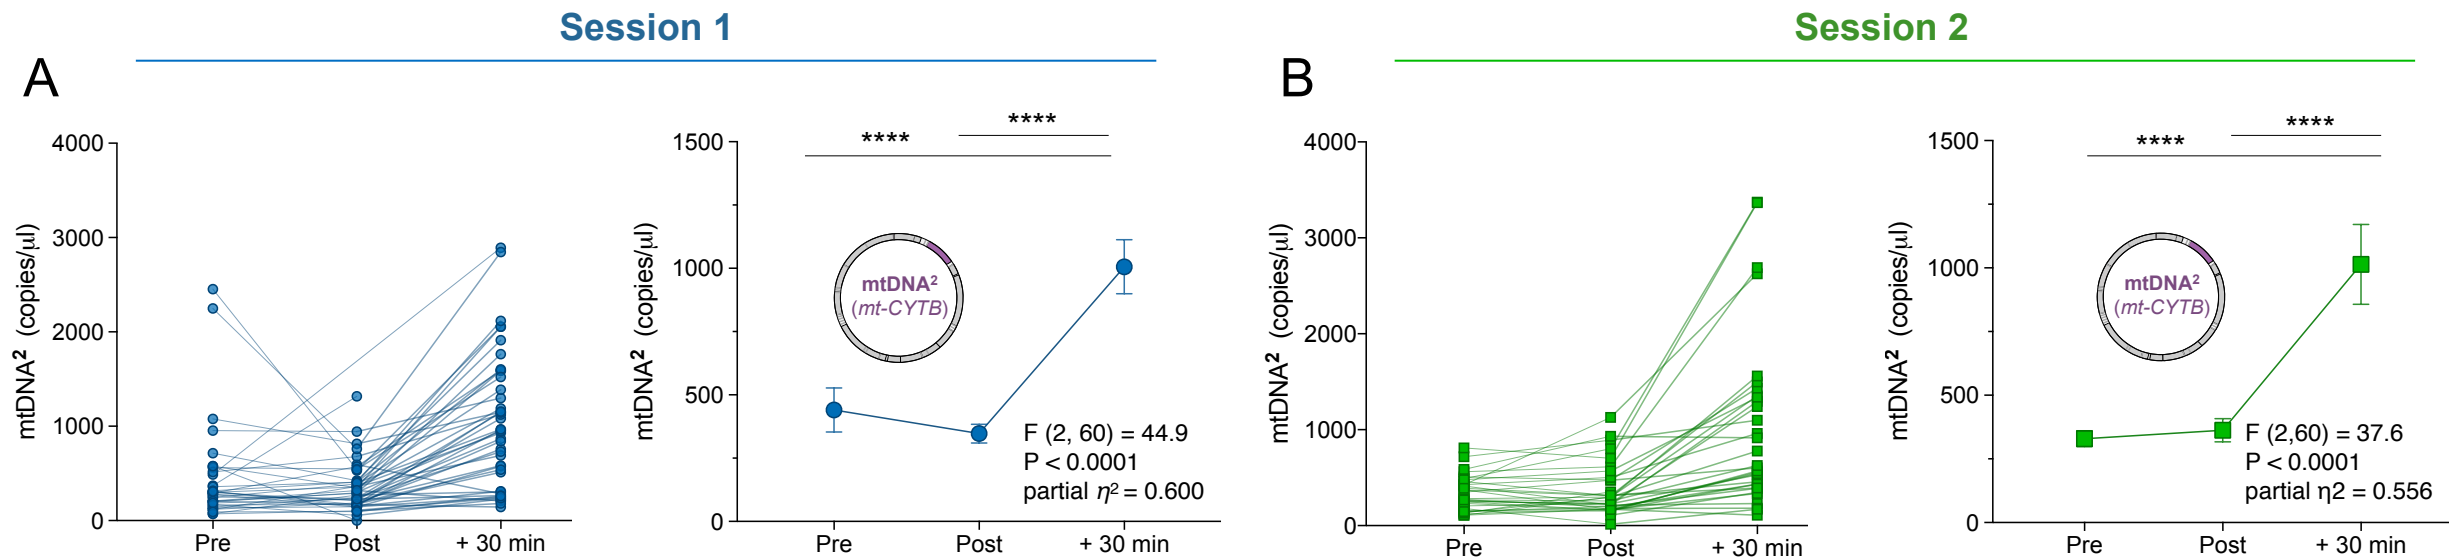

**Fig. S3. Psychological stress selectively increases serum circulating cell-free mitochondrial DNA.** (A) Individual (left) and group mean (right) ccf-mtDNA<sup>2</sup> (*mt-CYTB*) responses to acute psychological stress at session 1. (B) Validation of the results in (A) in a repeat session 2 one month later for ccf-mtDNA<sup>2</sup>. Data are means and SEM. Repeated measure ANOVA on log transformed data and Least Significant Difference (LSD) pairwise comparisons,  $n = 31$  per session, \*  $P < 0.05$ , \*\*  $P < 0.01$ , \*\*\*  $P < 0.001$ , \*\*\*\*  $P < 0.0001$ .

**Figure S4**

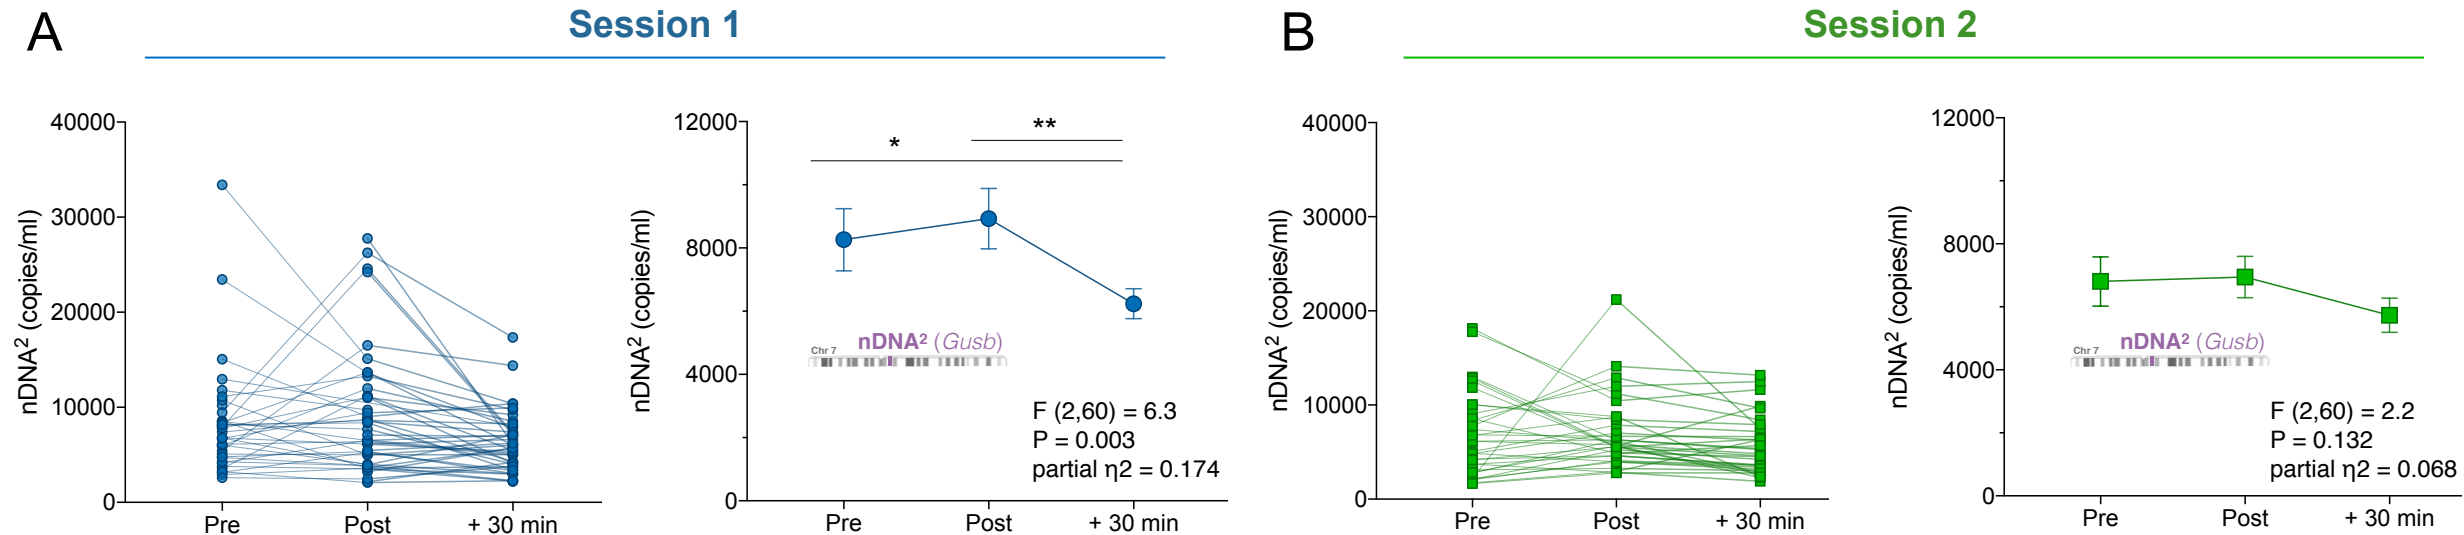

**Fig. S4. Psychological stress does not increase serum circulating cell-free nuclear DNA.** (A) Responses to acute psychological stress at session 1 for the nuclear DNA (ccf-nDNA<sup>2</sup>, *Gusb*) and (B) at the validation session 2. Data are means and SEM. Repeated measure ANOVA on log transformed data and Least Significant Difference (LSD) pairwise comparisons, n = 31 per session, \* P < 0.05, \*\* P < 0.01, \*\*\* P < 0.001, \*\*\*\* P < 0.0001.

**Figure S5**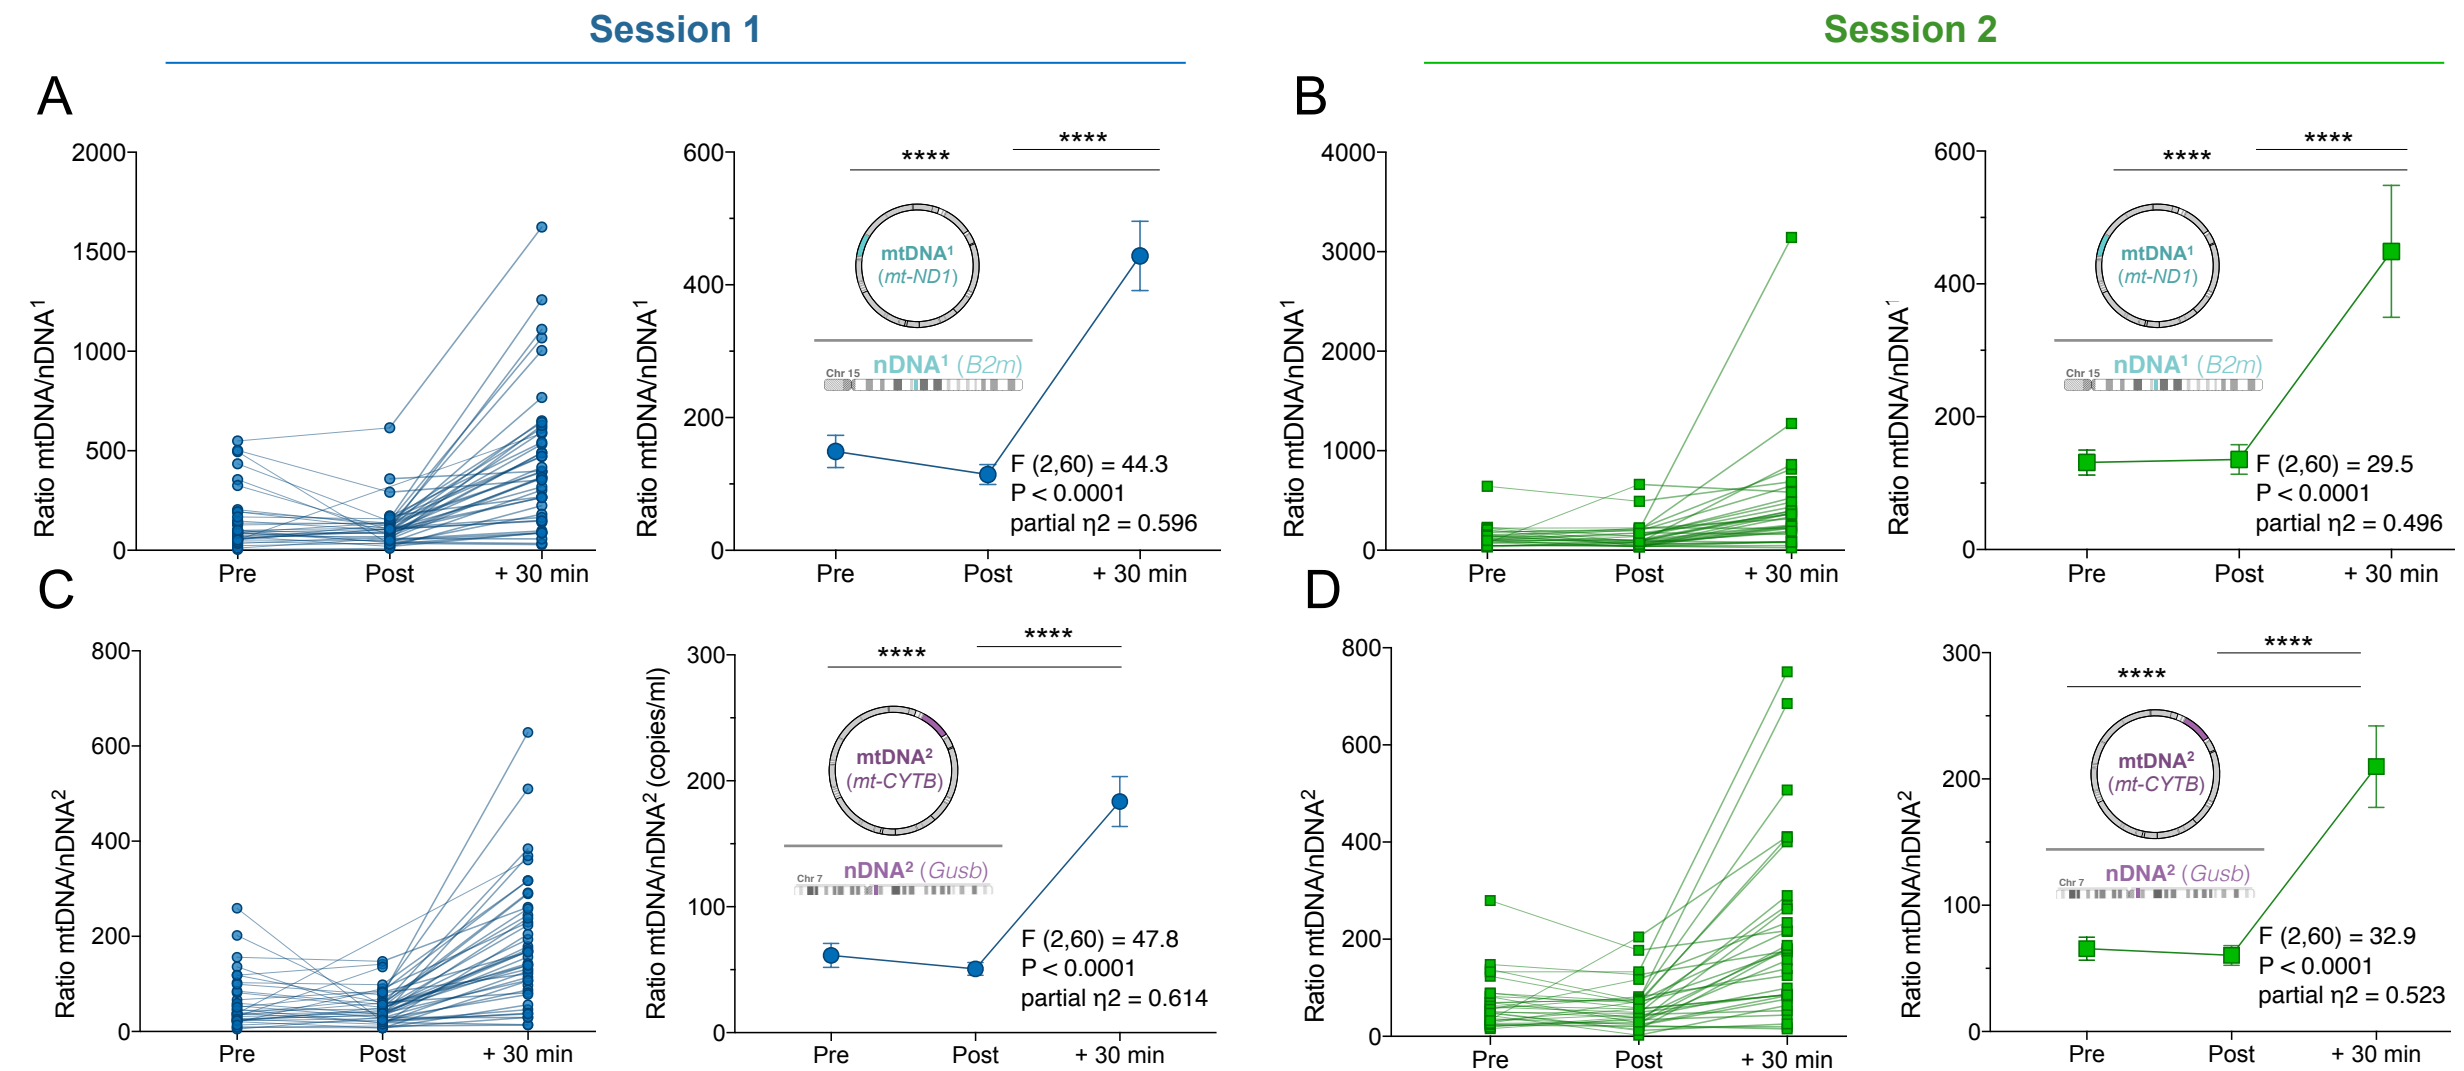

**Fig. S5. The mtDNA/nDNA ratio increases in response to acute psychological stress.** (A) Responses to acute psychological stress at session 1 for the ratio of ccf-mtDNA<sup>1</sup>/DNA<sup>1</sup> for each individual (left) and the group average (right) at Session 1 and (B) at the validation session 2. (C) Same as in (A) for ccf-mtDNA<sup>2</sup>/DNA<sup>2</sup> at session 1 and (D) at session 2. Data are means and SEM. Repeated measure ANOVA on log transformed data and Least Significant Difference (LSD) pairwise comparisons,  $n = 31$  per session, \*  $P < 0.05$ , \*\*  $P < 0.01$ , \*\*\*  $P < 0.001$ , \*\*\*\*  $P < 0.0001$ .

**Figure S6**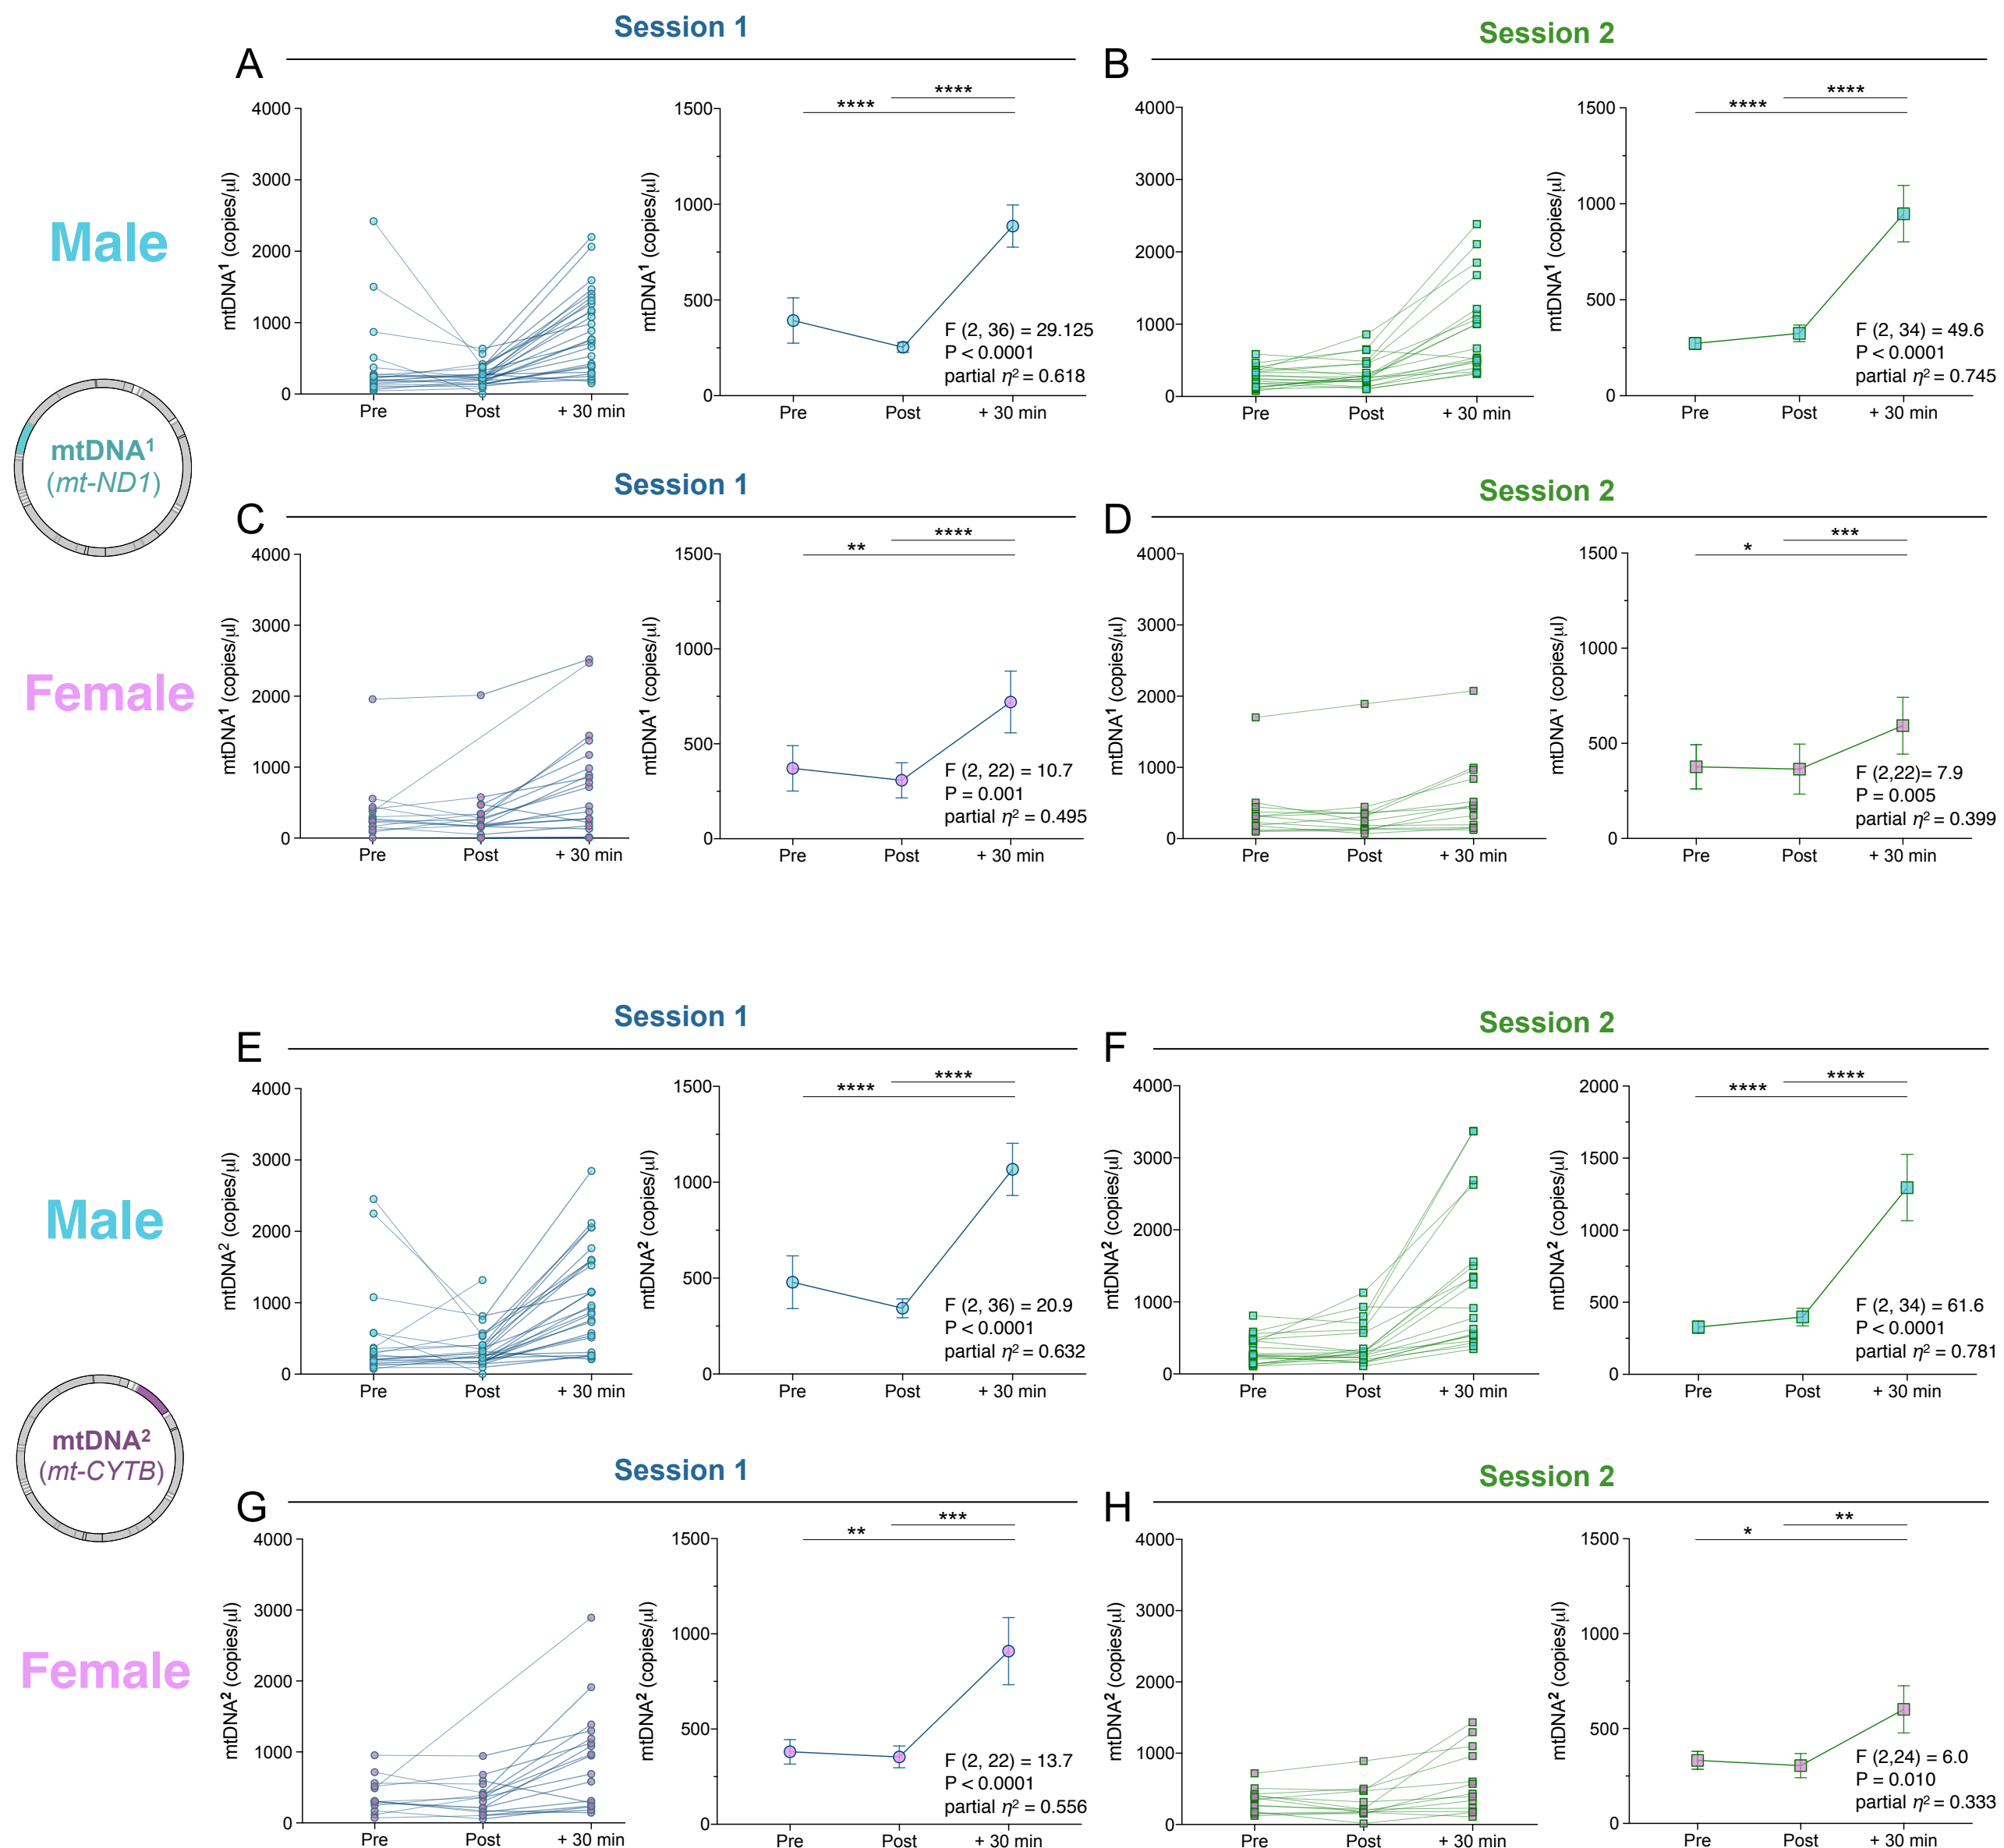

**Fig. S6. Free circulating mtDNA in response to acute psychological stress in men and women. (A) ccf-mtDNA<sup>1</sup> (*mt-ND1*) responses to acute psychological stress in male shown (left) for each individual and (right) for the group average on session 1 (B) and session 2, n = 19. (C) Same in female on session 1 (D) and session 2, n = 13. (E) Same as in (A) but for ccf-mtDNA<sup>2</sup> (*mt-CYTB*) on session 1 (F) and session 2, n = 19. (G) Same in female on session 1 (H) and session 2, n = 13. Repeated measure ANOVA on log transformed data and Least Significant Difference (LSD) pairwise comparisons. \* P < 0.05, \*\* P < 0.01, \*\*\* P < 0.001, \*\*\*\* P < 0.0001.**

# Figure S7

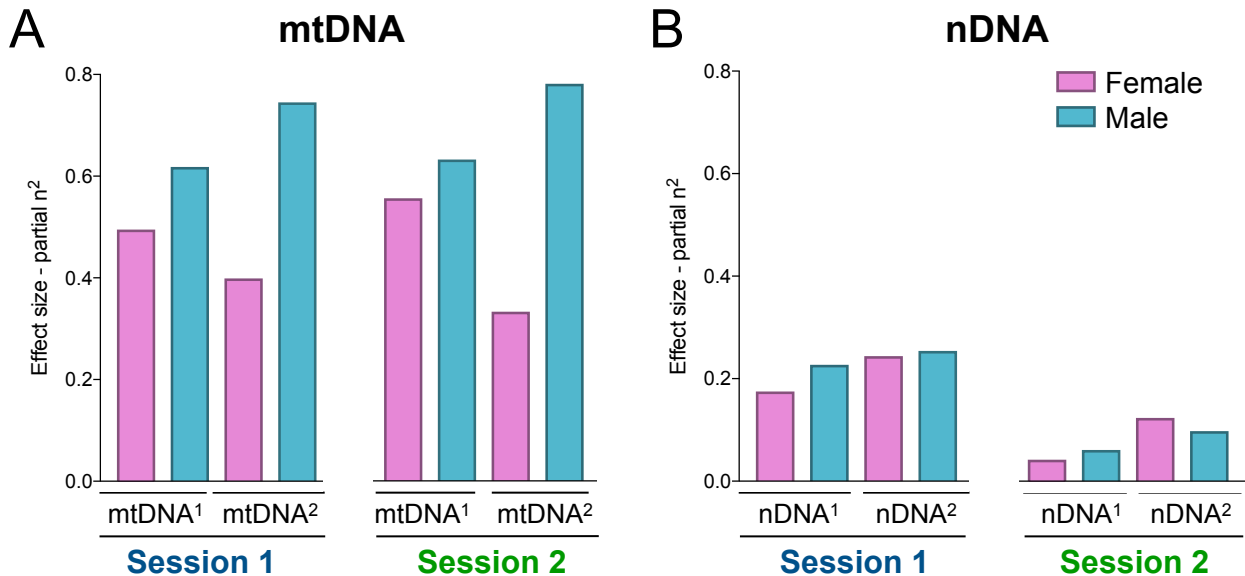

**Fig S7. Sex differences in stress-induced elevations in serum mtDNA and nDNA levels.** (A) Effect size (partial  $\eta^2$ ) of the ccf-mtDNA responses to acute psychological stress in female and male (full analysis presented in **SI, Fig. S6**). Repeated measure ANOVA performed on log-transformed data. (B) Same as (A) for nuclear DNA (nDNA).



**Figure S8****Session 1****Session 2**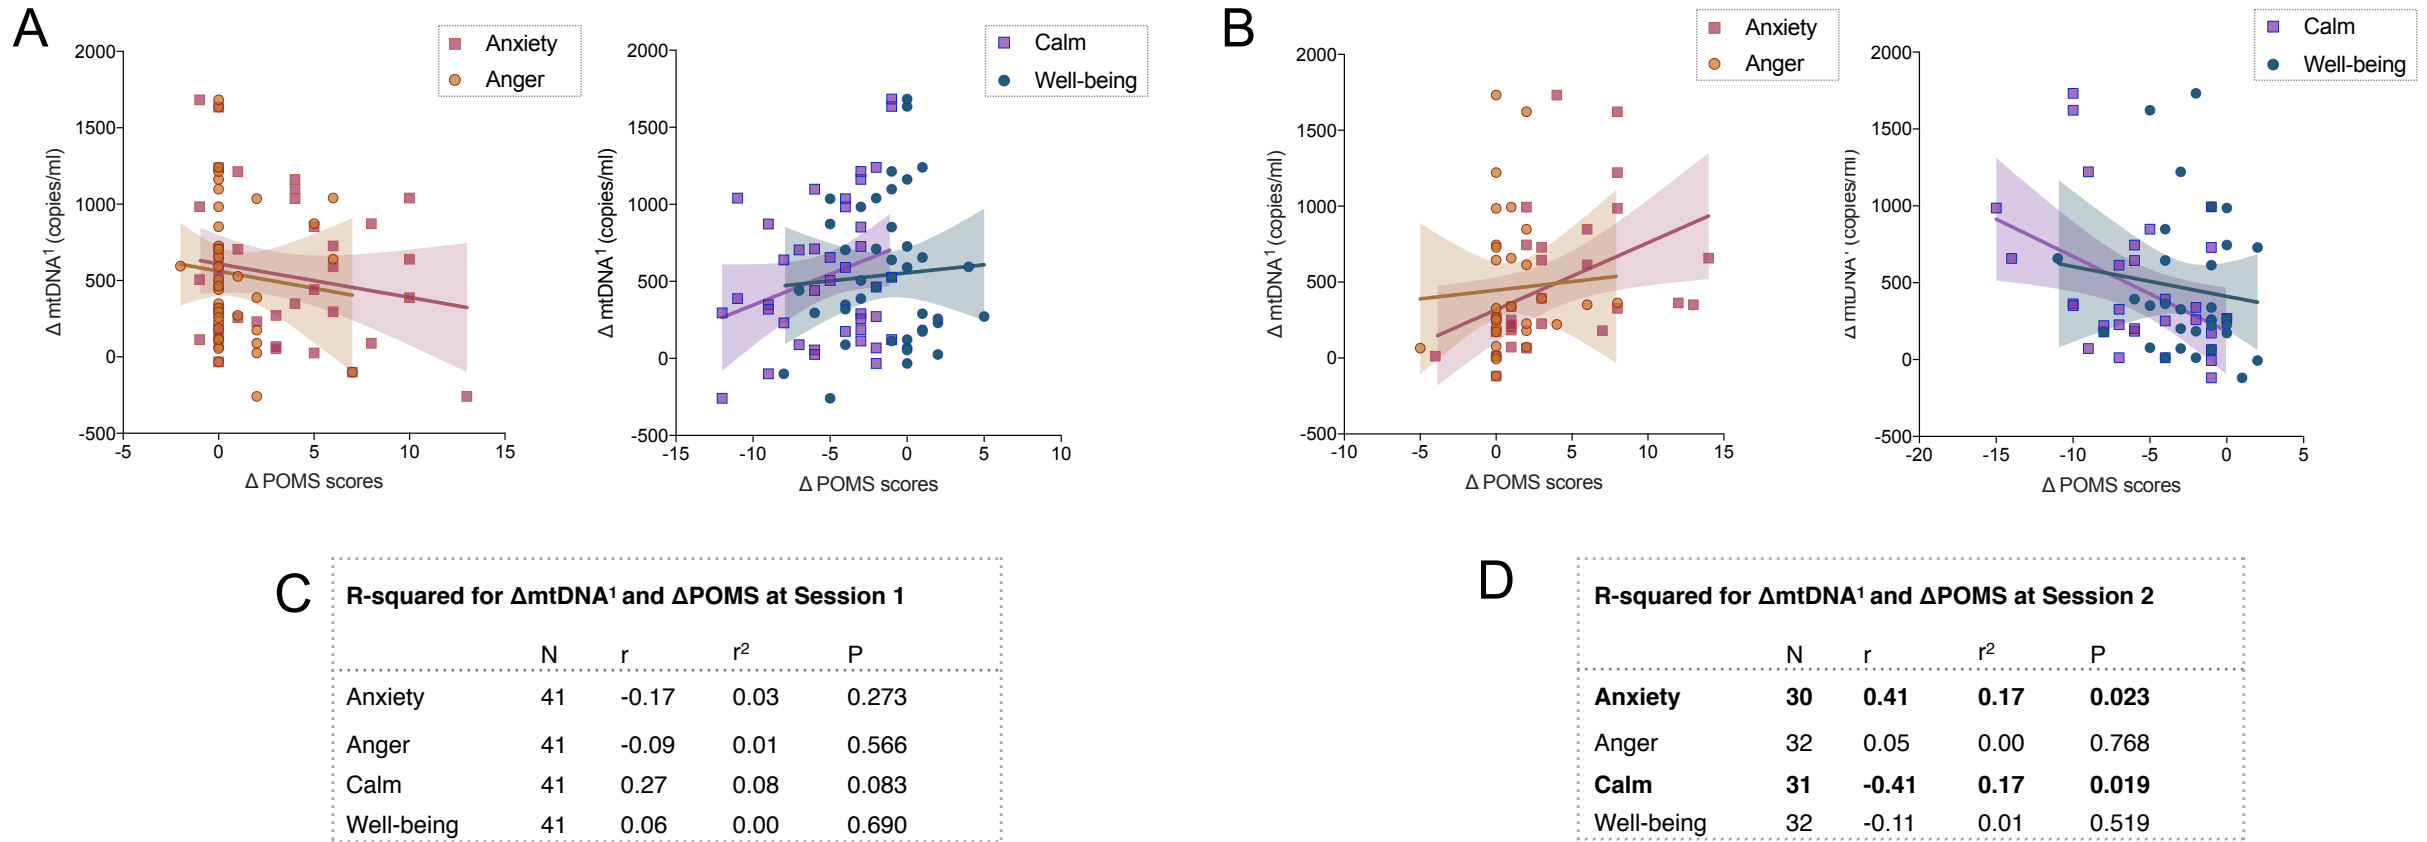

**Fig. S8. Association between change in psychological states (POMS scores) and the ccf-mtDNA response to induced psychological stress. (A)** Pearson correlations of the change in POMS score (from baseline to task) and change in ccf-mtDNA (from task to +30 minutes) at session 1, for two negative (Anxiety, Anger) and two positive (Calm, Well-being) affective states. **(B)** Same as in (A), for session 2. **(C)** Pearson correlation statistics between change in POMS scores and changes in ccf-mtDNA. **(D)** Same as in (C), for session 2.



**Figure S9**

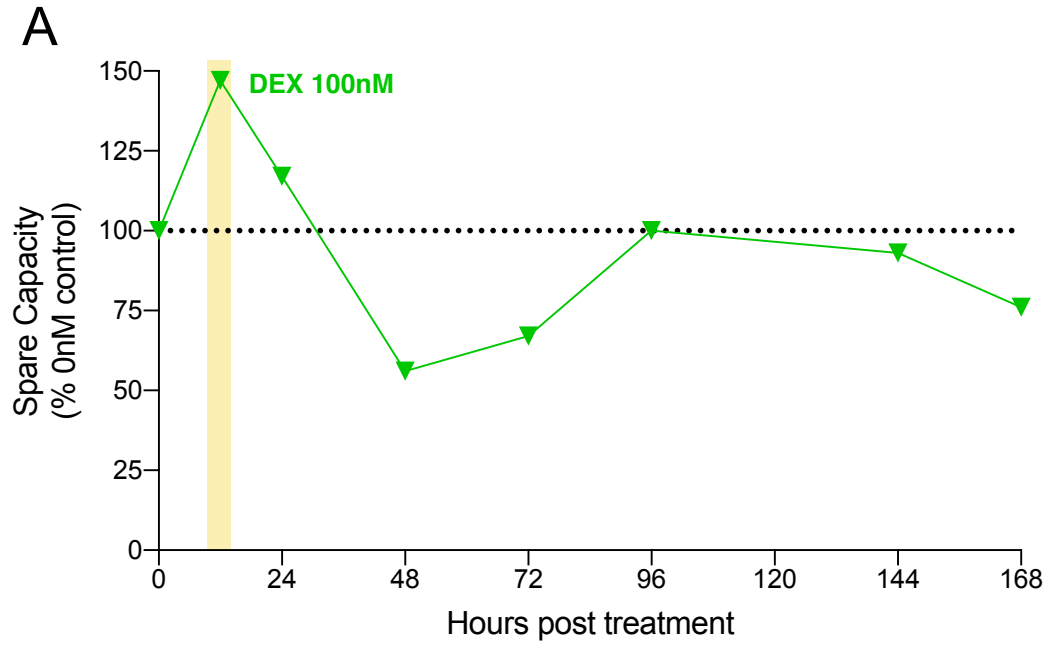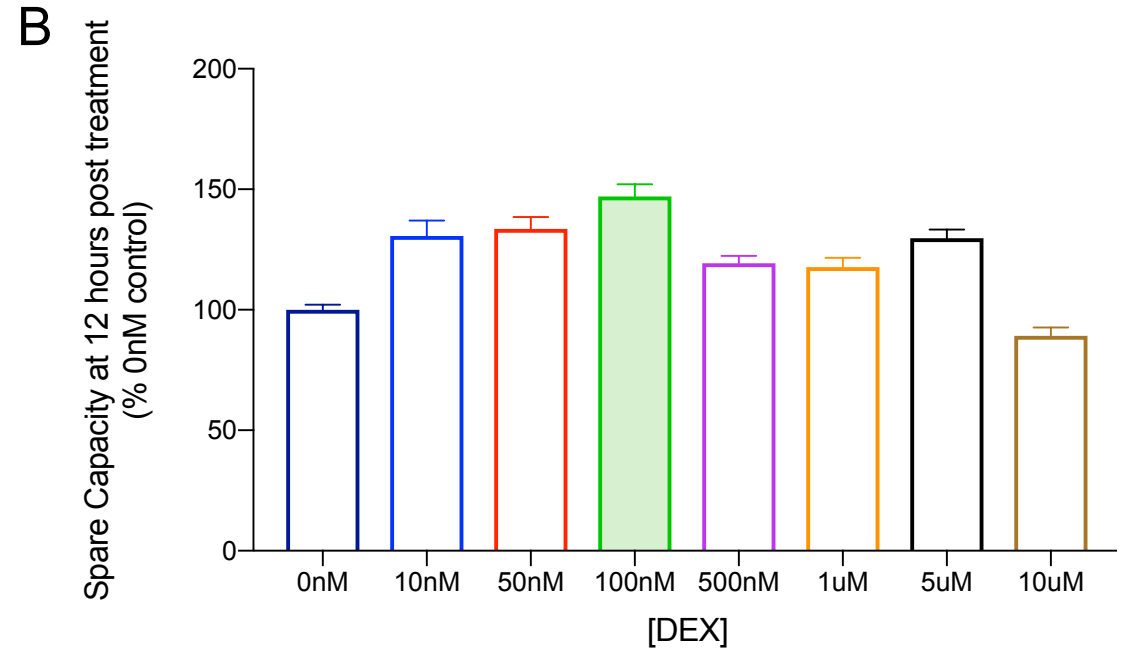

**Fig. S9. Dexamethasone (DEX) titration and change in mitochondrial respiration capacity.** (A) Mitochondrial spare respiratory capacity of primary human fibroblasts changes in response to 100nM dexamethasone, as previously used (Alm et al., 2012; Gerö and Szabo, 2016; Kim et al., 2013). Respiration was measured at different time points after exposure (12hr, 24hr, 48hr, 3d, 4d, 6d, 7d). Data shown as relative to 0nM control run at each time point (n = 11 technical replicates). In this system, the maximal change in spare capacity was observed after 12hr exposure (highlighted in yellow). (B) Mitochondrial spare capacity of primary human fibroblasts with titration of dexamethasone (10nM, 100nM, 500nM, 1uM, 5uM, 10uM) at 12hr. Data shown as relative to 0nM control run at each time point (n = 8-12 technical replicates). The maximal change in spare capacity was observed at 100nM DEX (highlighted in green).
